# Supplementary material
Source: publisher site journal article supplement (https://www.spandidos-publications.com/5156/downloadSupplementary)

Figure S1. The expression and efficiency of LAPTM5 on cell lines. (A) The protein expression of LAPTM5 on normal breast epithelial cells and breast cancer cell lines was examined by western blotting. (B and C) The overexpression efficiency and inhibition efficiency of LAPTM5 were evaluated by reverse transcription-quantitative PCR and western blot analysis. Data originated from three independent experiments are presented as the mean  $\pm$  SD. \*\* $P < 0.01$ . LAPTM5, lysosomal protein transmembrane 5; ns, not significant.

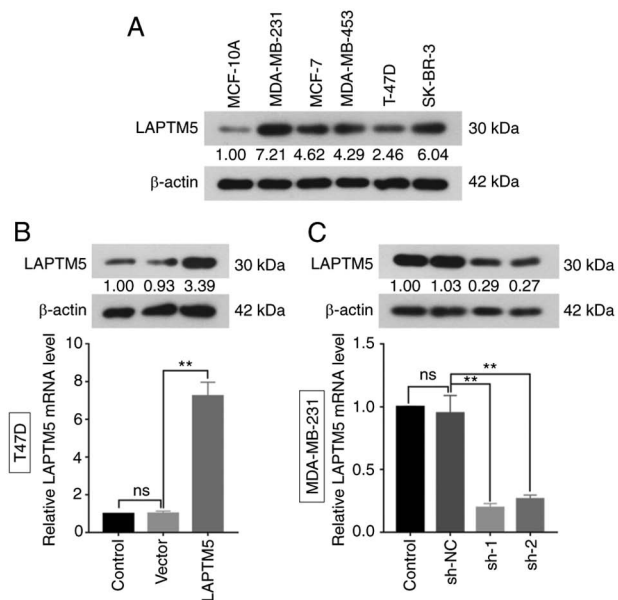

Supplement: Supplementary file 1 [file downloadSupplementary]
